# Supplementary material for: Clostridium thermocellum transcriptomic profiles after exposure to furfural or heat stress
Source: PubMed Central journal article supplement (PMC3848806; doi:10.1186/1754-6834-6-131), 2013-09-12

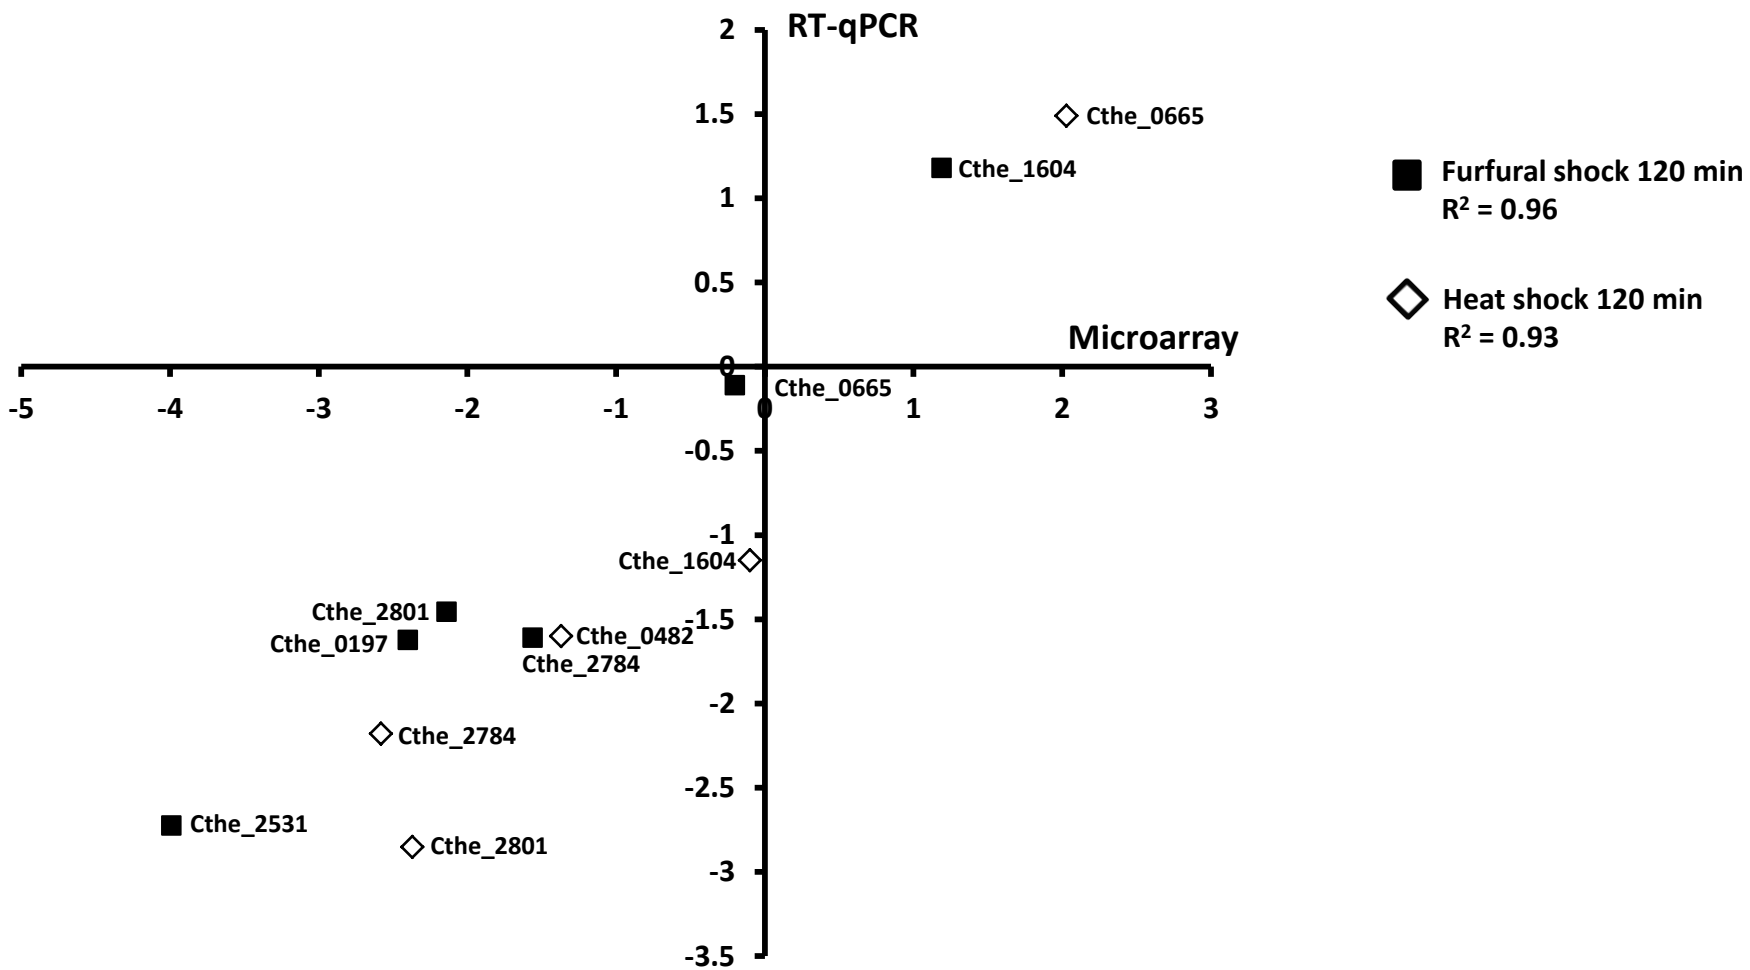

Supplement: 1754-6834-6-131-S2.pdf [file 1754-6834-6-131-S2.pdf]
